# Supplementary material
Source: PubMed Central journal article supplement (PMC8636174)
Supplement: mmc1.pdf [file mmc1.pdf]

## **Supplemental Information**

**Anti-NKG2C/IL-15/anti-CD33 killer engager**

**directs primary and iPSC-derived NKG2C<sup>+</sup>**

**NK cells to target myeloid leukemia**

**Emily Chiu, Martin Felices, Frank Cichocki, Zachary Davis, Hongbo Wang, Katie Tuninga, Daniel A. Vallera, Tom Lee, Ryan Bjordahl, Karl Johan Malmberg, Bahram Valamehr, and Jeffrey S. Miller**

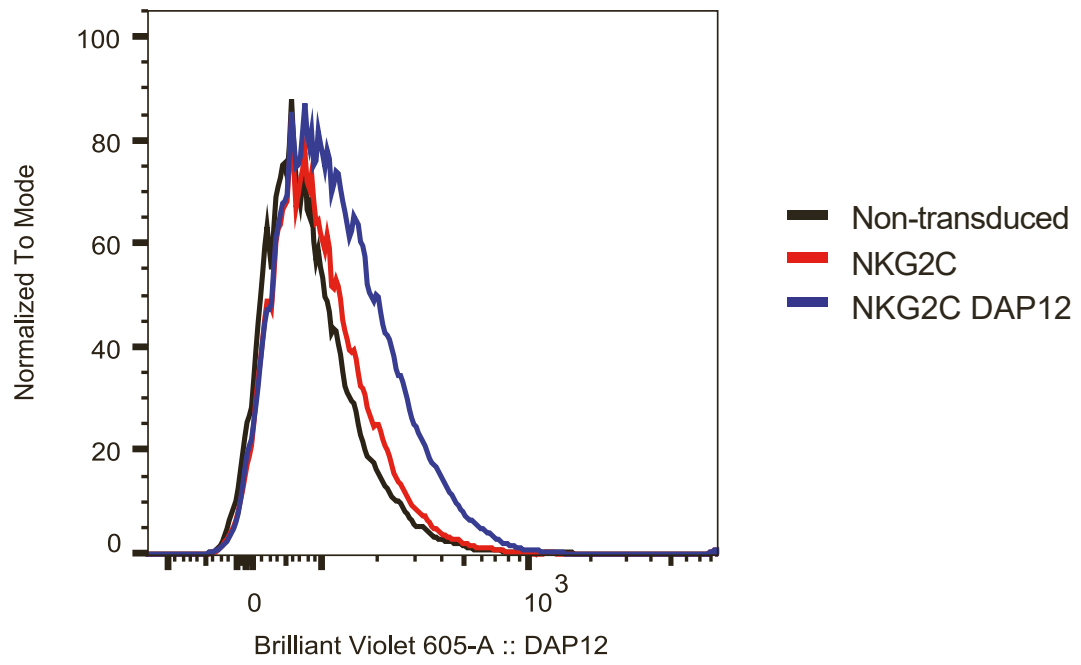

**Figure S1. NKG2C DAP12 iNK express more DAP12.** Thawed iNK, non-transduced (black), NKG2C (red), and NKG2C DAP12 (blue), at the end of two week expansion stained for intracellular DAP12.

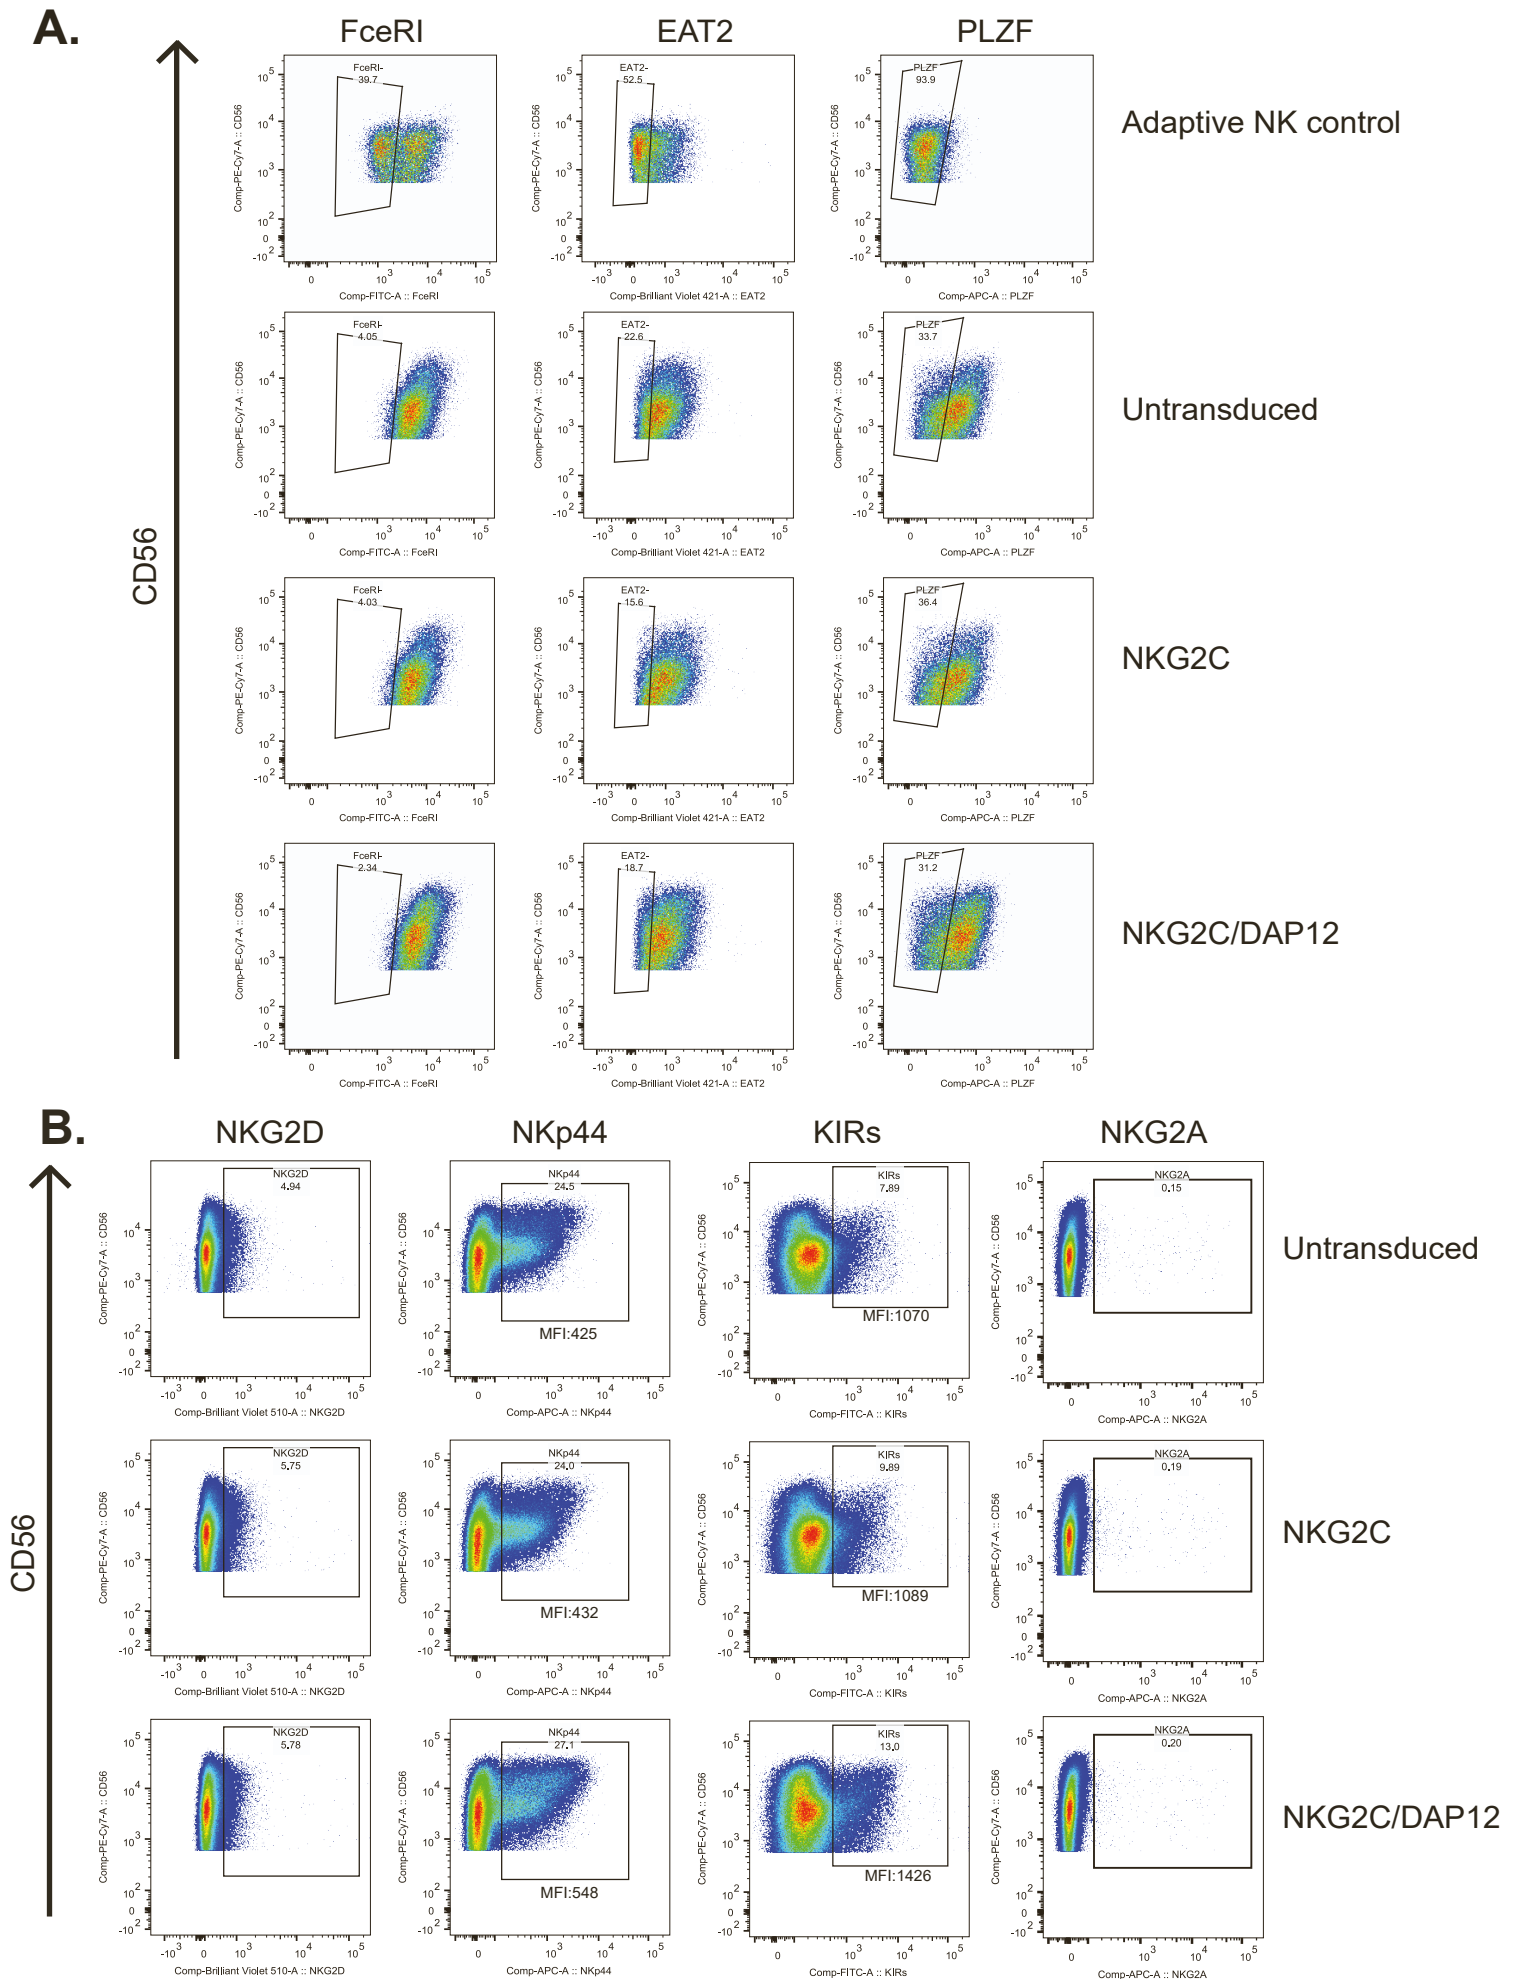

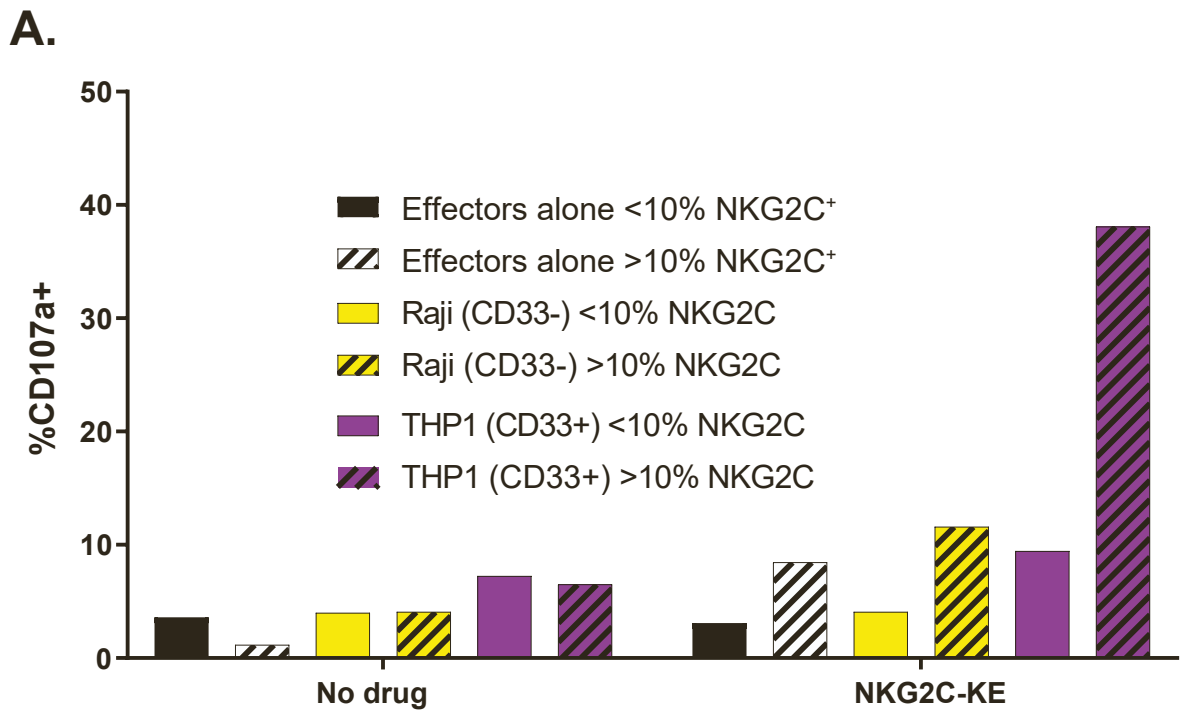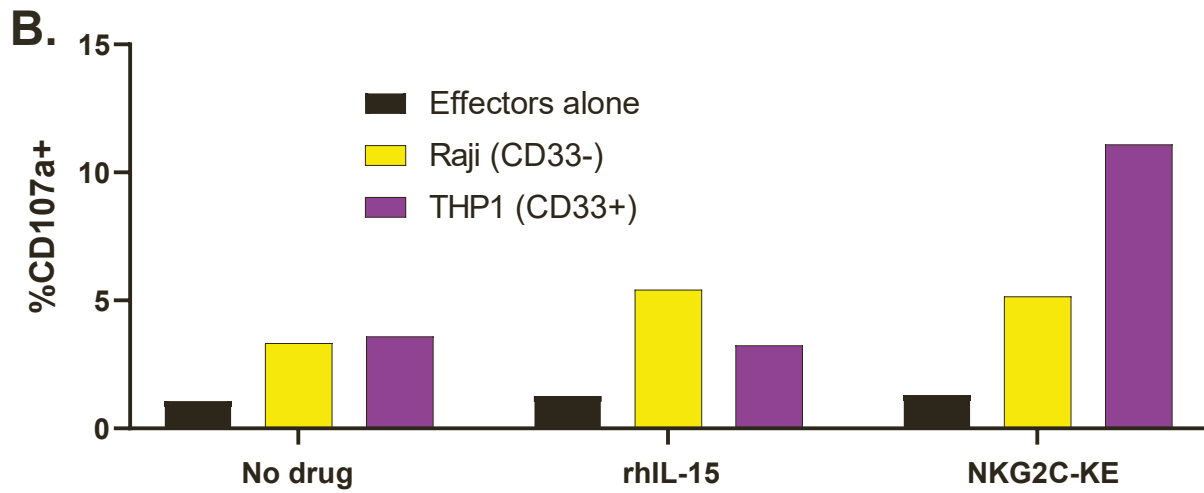

**Figure S3. NKG2C-KE directs NK cells towards CD33+ cells.** Healthy peripheral blood NK cells divided into <10% NKG2C+ (solid) and >10% NKG2C+ (striped) (A) and NKG2C DAP12 iNK (B) incubated with Raji (CD33-) or THP1(CD33+) and indicated treatments, No drug, rhIL-15 or NKG2C-KE, in a 5hr assay and stained for degranulation marker CD107a.ipsu

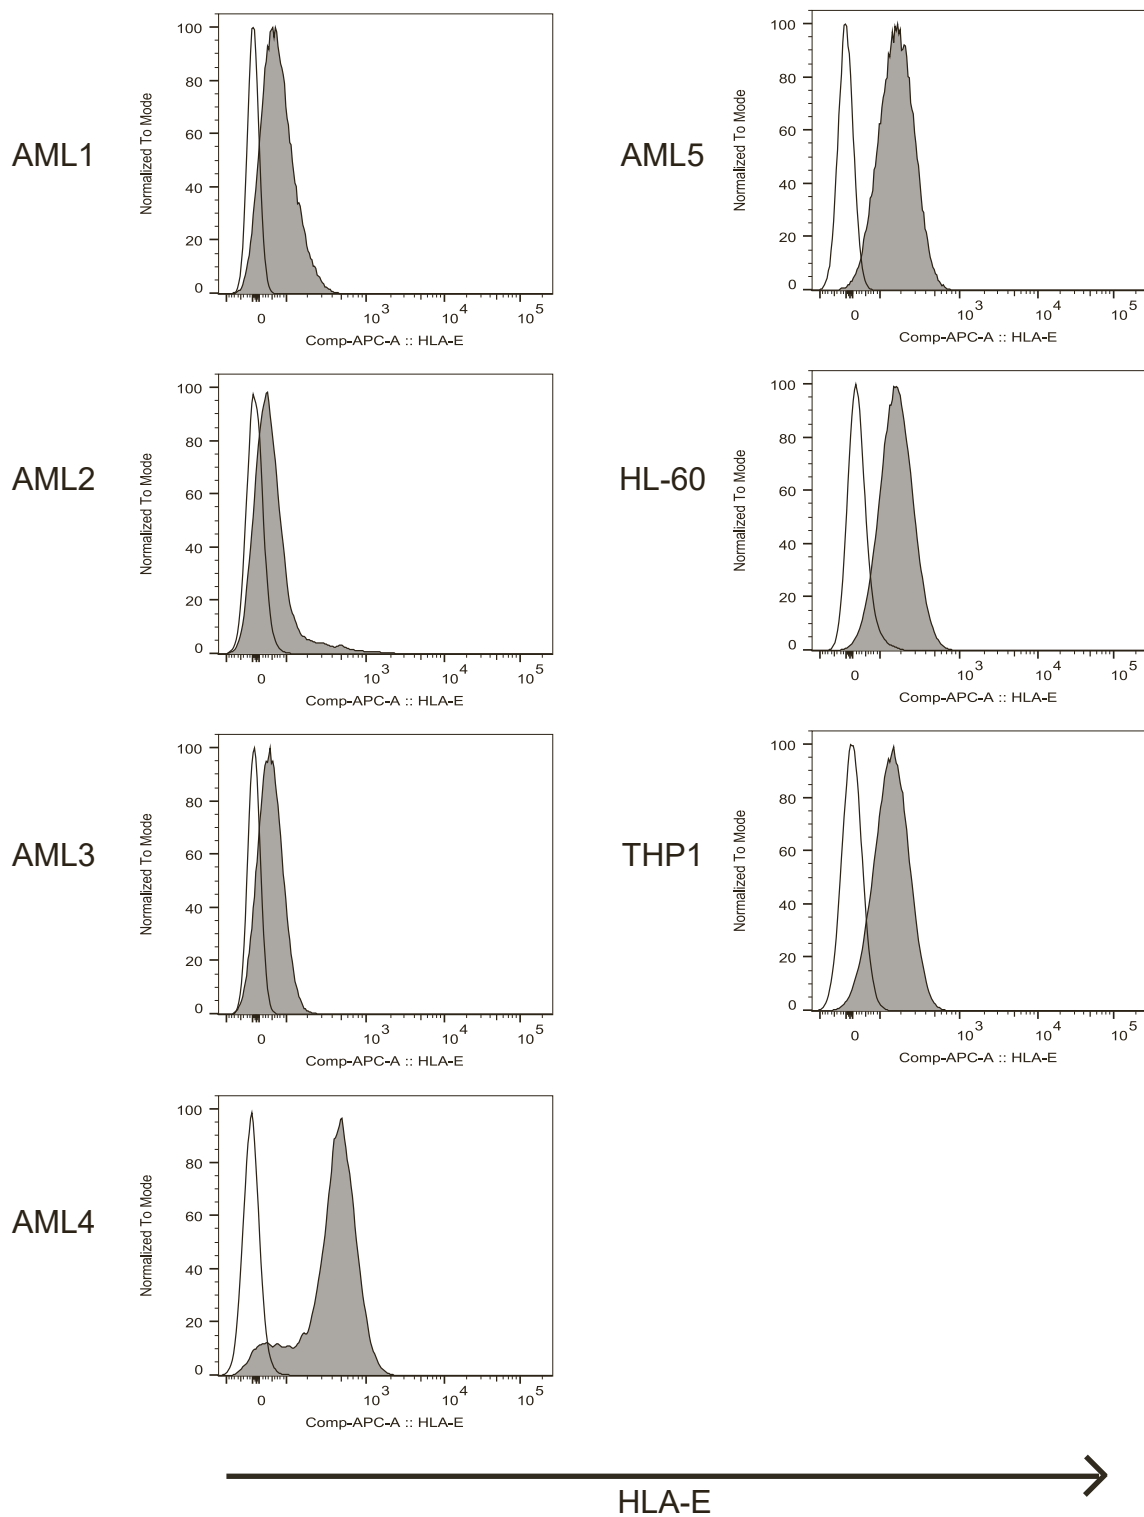

**Figure S4. Primary AML and cell lines express HLA-E.** Cell lines HL-60 and THP1 and primary AML samples thawed and rested overnight were stained for HLA-E in comparison to fluorescence minus one control.
